# Supplementary material
Source: Research Square preprint supplement (doi:10.21203/rs.3.rs-9682017/v1)
Supplement: Supplementary file 1 [file 676aa1a9ba34e7f79ba34d39.docx]

**Supplemental Materials**

**Supplemental Figure 1**. Cloud Plot Illustrating Distribution of Propensity Scores by Treatment Group (RCT Investigational vs. HCT Control)

|  |
| --- |
| Abbreviations: HCT = historical clinical trials, RCT = randomized controlled trial |
| The support region is defined as the largest interval that contains propensity scores for subjects in both groups. By default, the region is extended by 0.25 times a pooled estimate of the common standard deviation of the logit of the propensity score. |

**Supplemental Figure 2**. Absolute Value of Standardized Difference Between Treatment Groups in Baseline Demographics and Disease Characteristics - Before and After Optimal Full Propensity Score Matching (Target RCT Investigational Arm vs. HCT Controls)

Abbreviations: HCT = historical clinical trials, RCT = randomized clinical trial

**Supplemental Figure 3**. Calculation of E-value for a common outcome assumption


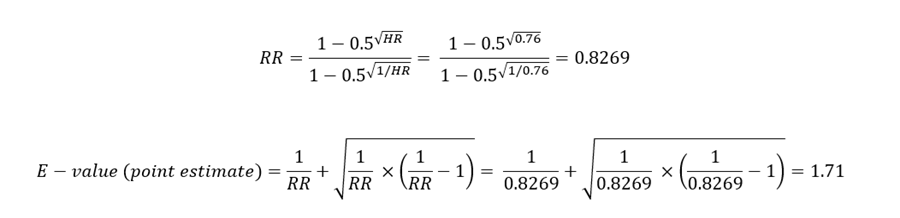


**Supplemental Table 1.** Statistical and clinical tipping points for overall survival (OS) analyses when hazard ratio (HR) for OS of those with and without unobserved confounder set to 2.0

| **Treatment Effect**  **HR (95% CI)** | | **Assumed prevalence of unobserved confounder in ECA** | | | | | | | | | | | | | | | | |
| --- | --- | --- | --- | --- | --- | --- | --- | --- | --- | --- | --- | --- | --- | --- | --- | --- | --- | --- |
| **0.0** | **0.05** | **0.1** | **0.15** | **0.2** | **0.25** | **0.3** | **0.35** | **0.4** | **0.45** | **0.5** | **0.55** | **0.6** | **0.65** | **0.7** | **0.75** | **0.8** |
| **Assumed prevalence of unobserved confounder in experimental arm** | **0.0** | 0.76  (0.63,0.91) | 0.80  (0.66,0.95) | 0.83  (0.70,1.00) | 0.87  (0.73,1.04) | 0.91  (0.76,1.09) | 0.95  (0.79,1.14) | 0.99  (0.82,1.18) | 1.02  (0.85,1.23) | 1.06  (0.88,1.27) | 1.10  (0.92,1.32) | 1.14  (0.95,1.36) | 1.17  (0.98,1.41) | 1.21  (1.01,1.45) | 1.25  (1.04,1.50) | 1.29  (1.07,1.54) | 1.33  (1.11,1.59) | 1.36  (1.14,1.63) |
|  |
| **0.05** | 0.72  (0.60,0.86) | 0.76  (0.63,0.91) | 0.79  (0.66,0.95) | 0.83  (0.69,0.99) | 0.87  (0.72,1.04) | 0.90  (0.75,1.08) | 0.94  (0.78,1.12) | 0.97  (0.81,1.17) | 1.01  (0.84,1.21) | 1.05  (0.87,1.25) | 1.08  (0.90,1.30) | 1.12  (0.93,1.34) | 1.16  (0.96,1.38) | 1.19  (0.99,1.43) | 1.23  (1.02,1.47) | 1.26  (1.05,1.51) | 1.30  (1.08,1.56) |
|  |
| **0.1** | 0.69  (0.57,0.83) | 0.72  (0.60,0.87) | 0.76  (0.63,0.91) | 0.79  (0.66,0.95) | 0.83  (0.69,0.99) | 0.86  (0.72,1.03) | 0.90  (0.75,1.07) | 0.93  (0.78,1.11) | 0.96  (0.80,1.16) | 1.00  (0.83,1.20) | 1.03  (0.86,1.24) | 1.07  (0.89,1.28) | 1.10  (0.92,1.32) | 1.14  (0.95,1.36) | 1.17  (0.98,1.40) | 1.21  (1.01,1.44) | 1.24  (1.03,1.49) |
|  |
| **0.15** | 0.66  (0.55,0.79) | 0.69  (0.58,0.83) | 0.73  (0.60,0.87) | 0.76  (0.63,0.91) | 0.79  (0.66,0.95) | 0.82  (0.69,0.99) | 0.86  (0.71,1.03) | 0.89  (0.74,1.07) | 0.92  (0.77,1.11) | 0.96  (0.80,1.14) | 0.99  (0.82,1.18) | 1.02  (0.85,1.22) | 1.05  (0.88,1.26) | 1.09  (0.91,1.30) | 1.12  (0.93,1.34) | 1.15  (0.96,1.38) | 1.19  (0.99,1.42) |
|  |
| **0.2** | 0.63  (0.53,0.76) | 0.66  (0.55,0.79) | 0.69  (0.58,0.83) | 0.73  (0.61,0.87) | 0.76  (0.63,0.91) | 0.79  (0.66,0.95) | 0.82  (0.68,0.98) | 0.85  (0.71,1.02) | 0.88  (0.74,1.06) | 0.92  (0.76,1.10) | 0.95  (0.79,1.13) | 0.98  (0.82,1.17) | 1.01  (0.84,1.21) | 1.04  (0.87,1.25) | 1.07  (0.90,1.29) | 1.11  (0.92,1.32) | 1.14  (0.95,1.36) |
|  |
| **0.25** | 0.61  (0.51,0.73) | 0.64  (0.53,0.76) | 0.67  (0.56,0.80) | 0.70  (0.58,0.84) | 0.73  (0.61,0.87) | 0.76  (0.63,0.91) | 0.79  (0.66,0.94) | 0.82  (0.68,0.98) | 0.85  (0.71,1.02) | 0.88  (0.73,1.05) | 0.91  (0.76,1.09) | 0.94  (0.78,1.13) | 0.97  (0.81,1.16) | 1.00  (0.83,1.20) | 1.03  (0.86,1.23) | 1.06  (0.88,1.27) | 1.09  (0.91,1.31) |
|  |
| **0.3** | 0.58  (0.49,0.70) | 0.61  (0.51,0.73) | 0.64  (0.53,0.77) | 0.67  (0.56,0.80) | 0.70  (0.58,0.84) | 0.73  (0.61,0.87) | 0.76  (0.63,0.91) | 0.79  (0.66,0.94) | 0.82  (0.68,0.98) | 0.85  (0.70,1.01) | 0.87  (0.73,1.05) | 0.90  (0.75,1.08) | 0.93  (0.78,1.12) | 0.96  (0.80,1.15) | 0.99  (0.83,1.19) | 1.02  (0.85,1.22) | 1.05  (0.88,1.26) |
|  |
| **0.35** | 0.56  (0.47,0.67) | 0.59  (0.49,0.71) | 0.62  (0.51,0.74) | 0.65  (0.54,0.77) | 0.67  (0.56,0.81) | 0.70  (0.59,0.84) | 0.73  (0.61,0.87) | 0.76  (0.63,0.91) | 0.79  (0.66,0.94) | 0.81  (0.68,0.98) | 0.84  (0.70,1.01) | 0.87  (0.73,1.04) | 0.90  (0.75,1.08) | 0.93  (0.77,1.11) | 0.95  (0.80,1.14) | 0.98  (0.82,1.18) | 1.01  (0.84,1.21) |
|  |
| **0.4** | 0.54  (0.45,0.65) | 0.57  (0.47,0.68) | 0.60  (0.50,0.71) | 0.62  (0.52,0.75) | 0.65  (0.54,0.78) | 0.68  (0.56,0.81) | 0.70  (0.59,0.84) | 0.73  (0.61,0.88) | 0.76  (0.63,0.91) | 0.79  (0.65,0.94) | 0.81  (0.68,0.97) | 0.84  (0.70,1.01) | 0.87  (0.72,1.04) | 0.89  (0.74,1.07) | 0.92  (0.77,1.10) | 0.95  (0.79,1.14) | 0.97  (0.81,1.17) |
|  |
| **0.45** | 0.52  (0.44,0.63) | 0.55  (0.46,0.66) | 0.58  (0.48,0.69) | 0.60  (0.50,0.72) | 0.63  (0.52,0.75) | 0.65  (0.54,0.78) | 0.68  (0.57,0.81) | 0.71  (0.59,0.85) | 0.73  (0.61,0.88) | 0.76  (0.63,0.91) | 0.78  (0.65,0.94) | 0.81  (0.68,0.97) | 0.84  (0.70,1.00) | 0.86  (0.72,1.03) | 0.89  (0.74,1.06) | 0.91  (0.76,1.10) | 0.94  (0.78,1.13) |
|  |
| **0.5** | 0.51  (0.42,0.61) | 0.53  (0.44,0.64) | 0.56  (0.46,0.67) | 0.58  (0.48,0.70) | 0.61  (0.51,0.73) | 0.63  (0.53,0.76) | 0.66  (0.55,0.79) | 0.68  (0.57,0.82) | 0.71  (0.59,0.85) | 0.73  (0.61,0.88) | 0.76  (0.63,0.91) | 0.78  (0.65,0.94) | 0.81  (0.67,0.97) | 0.83  (0.70,1.00) | 0.86  (0.72,1.03) | 0.88  (0.74,1.06) | 0.91  (0.76,1.09) |
|  |
| **0.55** | 0.49  (0.41,0.59) | 0.51  (0.43,0.62) | 0.54  (0.45,0.64) | 0.56  (0.47,0.67) | 0.59  (0.49,0.70) | 0.61  (0.51,0.73) | 0.64  (0.53,0.76) | 0.66  (0.55,0.79) | 0.68  (0.57,0.82) | 0.71  (0.59,0.85) | 0.73  (0.61,0.88) | 0.76  (0.63,0.91) | 0.78  (0.65,0.94) | 0.81  (0.67,0.97) | 0.83  (0.69,1.00) | 0.86  (0.71,1.03) | 0.88  (0.73,1.05) |
|  |
| **0.6** | 0.47  (0.39,0.57) | 0.50  (0.41,0.60) | 0.52  (0.43,0.62) | 0.54  (0.45,0.65) | 0.57  (0.47,0.68) | 0.59  (0.49,0.71) | 0.62  (0.51,0.74) | 0.64  (0.53,0.77) | 0.66  (0.55,0.79) | 0.69  (0.57,0.82) | 0.71  (0.59,0.85) | 0.73  (0.61,0.88) | 0.76  (0.63,0.91) | 0.78  (0.65,0.94) | 0.81  (0.67,0.96) | 0.83  (0.69,0.99) | 0.85  (0.71,1.02) |
|  |
| **0.65** | 0.46  (0.38,0.55) | 0.48  (0.40,0.58) | 0.51  (0.42,0.61) | 0.53  (0.44,0.63) | 0.55  (0.46,0.66) | 0.57  (0.48,0.69) | 0.60  (0.50,0.72) | 0.62  (0.52,0.74) | 0.64  (0.54,0.77) | 0.67  (0.56,0.80) | 0.69  (0.57,0.83) | 0.71  (0.59,0.85) | 0.74  (0.61,0.88) | 0.76  (0.63,0.91) | 0.78  (0.65,0.94) | 0.80  (0.67,0.96) | 0.83  (0.69,0.99) |
|  |
| **0.7** | 0.45  (0.37,0.53) | 0.47  (0.39,0.56) | 0.49  (0.41,0.59) | 0.51  (0.43,0.61) | 0.54  (0.45,0.64) | 0.56  (0.46,0.67) | 0.58  (0.48,0.69) | 0.60  (0.50,0.72) | 0.62  (0.52,0.75) | 0.65  (0.54,0.77) | 0.67  (0.56,0.80) | 0.69  (0.58,0.83) | 0.71  (0.59,0.85) | 0.74  (0.61,0.88) | 0.76  (0.63,0.91) | 0.78  (0.65,0.93) | 0.80  (0.67,0.96) |
|  |
| **0.75** | 0.43  (0.36,0.52) | 0.45  (0.38,0.54) | 0.48  (0.40,0.57) | 0.50  (0.42,0.60) | 0.52  (0.43,0.62) | 0.54  (0.45,0.65) | 0.56  (0.47,0.67) | 0.58  (0.49,0.70) | 0.61  (0.51,0.73) | 0.63  (0.52,0.75) | 0.65  (0.54,0.78) | 0.67  (0.56,0.80) | 0.69  (0.58,0.83) | 0.71  (0.60,0.86) | 0.74  (0.61,0.88) | 0.76  (0.63,0.91) | 0.78  (0.65,0.93) |
|  |
| **0.8** | 0.42  (0.35,0.50) | 0.44  (0.37,0.53) | 0.46  (0.39,0.55) | 0.48  (0.40,0.58) | 0.51  (0.42,0.61) | 0.53  (0.44,0.63) | 0.55  (0.46,0.66) | 0.57  (0.47,0.68) | 0.59  (0.49,0.71) | 0.61  (0.51,0.73) | 0.63  (0.53,0.76) | 0.65  (0.54,0.78) | 0.67  (0.56,0.81) | 0.69  (0.58,0.83) | 0.72  (0.60,0.86) | 0.74  (0.61,0.88) | 0.76  (0.63,0.91) |
