# Supplementary material
Source: Research Square preprint supplement (doi:10.21203/rs.3.rs-9682017/v1)
Supplement: Supplementary file 2 [file cc5d5cb15c60d976d8fe6533.docx]

**Table 1.** Comparison of Baseline Patient Demographics and Disease Characteristics in the Target RCT Investigational Arm and Control Arm Patients from Historical Trials Before and After Matching

|  | Before Matching | | | After Matching | | |
| --- | --- | --- | --- | --- | --- | --- |
|  | Experimental Arm in Target RCT (N=294) | HCT Control (N=201) | SMD | Matched Experimental Arm in Target RCT (N=290) | ECA  Weighted Summary | SMD |
| (N=290) |
| **Propensity score** |  |  | 0.827 |  |  | 0.171 |
| Effective sample size | 294 | 201 |  | 290 | 290 |  |
| Mean (std) | 0.65 (0.169) | 0.51 (0.178) |  | 0.65 (0.167) | 0.62 (0.214) |  |
| Median | 0.68 | 0.5 |  | 0.68 | 0.68 |  |
| Min, Max | 0.1, 1.0 | 0.1, 0.9 |  | 0.1, 0.9 | 0.2, 0.9 |  |
| **Age (years)** |  |  | -0.186 |  |  | -0.085 |
| n | 294 | 201 |  | 290 | 290 |  |
| Mean (std) | 63.6 (9.35) | 65.2 (8.48) |  | 63.5 (9.40) | 64.3 (9.58) |  |
| Median | 64 | 66 |  | 64 | 65 |  |
| Min, Max | 35, 84 | 42, 85 |  | 35, 84 | 42, 81 |  |
| **Sex, n (%)** |  |  | 0.054 |  |  | -0.007 |
| Male | 176 (59.9) | 115 (57.2) |  | 174 (60.0) | 175 (60.3) |  |
| Female | 118 (40.1) | 86 (42.8) |  | 116 (40.0) | 115 (39.7) |  |
| **Race, n (%)** |  |  | -0.246 |  |  |  |
| White | 236 (80.3) | 179 (89.1) |  | 235 (81.0) | 241 (83.1) | -0.054 |
| Others | 58 (19.7) | 22 (10.9) |  | 55 (19.0) | 49 (16.9) |  |
| **Region, n (%)** |  |  | -0.063 |  |  |  |
| Europe | 234 (79.6) | 165 (82.1) |  | 232 (80.0) | 224 (77.2) | 0.067 |
| Others | 60 (20.4) | 36 (17.9) |  | 58 (20.0) | 66 (22.8) |  |
| **Baseline ECOG-PS, n (%)** |  |  |  |  |  |  |
| 0 | 108 (36.7) | 50 (24.9) | 0.259 | 105 (36.2) | 91 (31.4) | 0.102 |
| 1 | 134 (45.6) | 109 (54.2) | -0.174 | 134 (46.2) | 144 (49.7) | -0.069 |
| 2 or 3 | 52 (17.7) | 42 (20.9) | -0.081 | 51 (17.6) | 55 (19.0) | -0.036 |
| **Number Drug Classes Refractory, n (%)** |  |  | -0.419 |  |  | -0.075 |
| <4 | 82 (27.9) | 96 (47.8) |  | 81 (27.9) | 91 (31.4) |  |
| ≥4 | 212 (72.1) | 105 (52.2) |  | 209 (72.1) | 199 (68.6) |  |
| **Cytogenetic Risk, n (%)** |  |  | -0.26 |  |  | -0.107 |
| High | 29 (9.9) | 38 (18.9) |  | 29 (10.0) | 39 (13.4) |  |
| Standard/Unknown | 265 (90.1) | 163 (81.1) |  | 261 (90.0) | 251 (86.6) |  |
| **Prior Stem Cell Transplant, n (%)** |  |  | 0.3 |  |  | 0.035 |
| Yes | 181 (61.6) | 94 (46.8) |  | 177 (61.0) | 172 (59.3) |  |
| No | 113 (38.4) | 107 (53.2) |  | 113 (39.0) | 118 (40.7) |  |
| **Days Since Last PD/Relapse to First Study Dose** |  |  | -0.232 |  |  | -0.081 |
| n | 294 | 201 |  | 290 | 290 |  |
| Mean (std) | 64.2 (79.66) | 86.2 (108.01) |  | 64.6 (80.12) | 71.2 (104.54) |  |
| Median | 44 | 47 |  | 44 | 44 |  |
| Min, Max | 0, 1105 | 7, 712 |  | 0, 1105 | 7, 607 |  |
| **Bone Lesion, n (%)** |  |  | 0.112 |  |  | 0.067 |
| Yes | 207 (70.4) | 131 (65.2) |  | 204 (70.3) | 195 (67.2) |  |
| No | 87 (29.6) | 70 (34.8) |  | 86 (29.7) | 95 (32.8) |  |
| **Best Response to the Last Therapy, n (%)** |  |  | 0.239 |  |  | 0.014 |
| ≥PR | 110 (37.4) | 53 (26.4) |  | 106 (36.6) | 104 (35.9) |  |
| <PR/Unknown | 184 (62.6) | 148 (73.6) |  | 184 (63.4) | 186 (64.1) |  |
| **Number of Prior Lines of Therapy, n (%)** |  |  | 0.196 |  |  | 0.017 |
| <4 | 68 (23.1) | 31 (15.4) |  | 64 (22.1) | 62 (21.4) |  |
| ≥4 | 226 (76.9) | 170 (84.6) |  | 226 (77.9) | 228 (78.6) |  |
| **Years Since Diagnosis** |  |  | -0.071 |  |  | 0.046 |
| n | 294 | 201 |  | 290 | 290 |  |
| Mean (std) | 6.3 (4.07) | 6.6 (3.78) |  | 6.3 (4.08) | 6.1 (4.39) |  |
| Median | 5.3 | 5.5 |  | 5.4 | 5.3 |  |
| Min, Max | 1, 30 | 2, 24 |  | 1, 30 | 2, 24 |  |
| **Weight (kg)** |  |  | 0.104 |  |  | 0.081 |
| n | 294 | 201 |  | 290 | 290 |  |
| Mean (std) | 74.7 (15.25) | 73.1 (15.39) |  | 74.5 (15.31) | 73.3 (18.39) |  |
| Median | 74.7 | 70.7 |  | 74.5 | 71.3 |  |
| Min, Max | 41, 127 | 40, 140 |  | 41, 127 | 40, 140 |  |

SMD: Standardized mean difference; HCT = historical clinical trial; PR = partial response; RCT = randomized controlled trial; ECA = external control arm; ECOG-PS=The Eastern Cooperative Oncology Group Performance Status; Std= Standard deviation

**Table 2.** Statistical and clinical tipping points for overall survival (OS) analyses when hazard ratio (HR) for OS of those with and without unobserved confounder set to 1.5

| **Treatment Effect**  **HR (95% CI)** | | **Assumed prevalence of unobserved confounder in ECA** | | | | | | | | | | | | | | | | |
| --- | --- | --- | --- | --- | --- | --- | --- | --- | --- | --- | --- | --- | --- | --- | --- | --- | --- | --- |
| **0.0** | **0.05** | **0.1** | **0.15** | **0.2** | **0.25** | **0.3** | **0.35** | **0.4** | **0.45** | **0.5** | **0.55** | **0.6** | **0.65** | **0.7** | **0.75** | **0.8** |
| **Assumed prevalence of unobserved confounder in investigational arm** | **0.0** | 0.76  (0.63,0.91) | 0.78  (0.65,0.93) | 0.80  (0.66,0.95) | 0.81  (0.68,0.98) | 0.83  (0.70,1.00) | 0.85  (0.71,1.02) | 0.87  (0.73,1.04) | 0.89  (0.74,1.07) | 0.91  (0.76,1.09) | 0.93  (0.77,1.11) | 0.95  (0.79,1.14) | 0.97  (0.81,1.16) | 0.99  (0.82,1.18) | 1.00  (0.84,1.20) | 1.02  (0.85,1.23) | 1.04  (0.87,1.25) | 1.06  (0.88,1.27) |
| **0.05** | 0.74  (0.62,0.89) | 0.76  (0.63,0.91) | 0.78  (0.65,0.93) | 0.79  (0.66,0.95) | 0.81  (0.68,0.97) | 0.83  (0.69,1.00) | 0.85  (0.71,1.02) | 0.87  (0.72,1.04) | 0.89  (0.74,1.06) | 0.91  (0.76,1.09) | 0.92  (0.77,1.11) | 0.94  (0.79,1.13) | 0.96  (0.80,1.15) | 0.98  (0.82,1.17) | 1.00  (0.83,1.20) | 1.02  (0.85,1.22) | 1.04  (0.86,1.24) |
|  |
| **0.1** | 0.72  (0.60,0.86) | 0.74  (0.62,0.89) | 0.76  (0.63,0.91) | 0.78  (0.65,0.93) | 0.79  (0.66,0.95) | 0.81  (0.68,0.97) | 0.83  (0.69,0.99) | 0.85  (0.71,1.02) | 0.87  (0.72,1.04) | 0.88  (0.74,1.06) | 0.90  (0.75,1.08) | 0.92  (0.77,1.10) | 0.94  (0.78,1.12) | 0.96  (0.80,1.15) | 0.97  (0.81,1.17) | 0.99  (0.83,1.19) | 1.01  (0.84,1.21) |
|  |
| **0.15** | 0.71  (0.59,0.84) | 0.72  (0.60,0.87) | 0.74  (0.62,0.89) | 0.76  (0.63,0.91) | 0.78  (0.65,0.93) | 0.79  (0.66,0.95) | 0.81  (0.68,0.97) | 0.83  (0.69,0.99) | 0.85  (0.71,1.01) | 0.86  (0.72,1.03) | 0.88  (0.73,1.06) | 0.90  (0.75,1.08) | 0.92  (0.76,1.10) | 0.93  (0.78,1.12) | 0.95  (0.79,1.14) | 0.97  (0.81,1.16) | 0.99  (0.82,1.18) |
|  |
| **0.2** | 0.69  (0.57,0.83) | 0.71  (0.59,0.85) | 0.72  (0.60,0.87) | 0.74  (0.62,0.89) | 0.76  (0.63,0.91) | 0.78  (0.65,0.93) | 0.79  (0.66,0.95) | 0.81  (0.68,0.97) | 0.83  (0.69,0.99) | 0.84  (0.70,1.01) | 0.86  (0.72,1.03) | 0.88  (0.73,1.05) | 0.90  (0.75,1.07) | 0.91  (0.76,1.09) | 0.93  (0.78,1.11) | 0.95  (0.79,1.14) | 0.96  (0.80,1.16) |
|  |
| **0.25** | 0.67  (0.56,0.81) | 0.69  (0.58,0.83) | 0.71  (0.59,0.85) | 0.72  (0.60,0.87) | 0.74  (0.62,0.89) | 0.76  (0.63,0.91) | 0.77  (0.65,0.93) | 0.79  (0.66,0.95) | 0.81  (0.67,0.97) | 0.83  (0.69,0.99) | 0.84  (0.70,1.01) | 0.86  (0.72,1.03) | 0.88  (0.73,1.05) | 0.89  (0.74,1.07) | 0.91  (0.76,1.09) | 0.93  (0.77,1.11) | 0.94  (0.79,1.13) |
|  |
| **0.3** | 0.66  (0.55,0.79) | 0.68  (0.56,0.81) | 0.69  (0.58,0.83) | 0.71  (0.59,0.85) | 0.73  (0.60,0.87) | 0.74  (0.62,0.89) | 0.76  (0.63,0.91) | 0.77  (0.65,0.93) | 0.79  (0.66,0.95) | 0.81  (0.67,0.97) | 0.82  (0.69,0.99) | 0.84  (0.70,1.01) | 0.86  (0.71,1.03) | 0.87  (0.73,1.05) | 0.89  (0.74,1.07) | 0.91  (0.76,1.09) | 0.92  (0.77,1.11) |
|  |
| **0.35** | 0.65  (0.54,0.77) | 0.66  (0.55,0.79) | 0.68  (0.56,0.81) | 0.69  (0.58,0.83) | 0.71  (0.59,0.85) | 0.73  (0.61,0.87) | 0.74  (0.62,0.89) | 0.76  (0.63,0.91) | 0.77  (0.65,0.93) | 0.79  (0.66,0.95) | 0.81  (0.67,0.97) | 0.82  (0.69,0.99) | 0.84  (0.70,1.00) | 0.85  (0.71,1.02) | 0.87  (0.73,1.04) | 0.89  (0.74,1.06) | 0.90  (0.75,1.08) |
|  |
| **0.4** | 0.63  (0.53,0.76) | 0.65  (0.54,0.78) | 0.66  (0.55,0.79) | 0.68  (0.57,0.81) | 0.69  (0.58,0.83) | 0.71  (0.59,0.85) | 0.73  (0.61,0.87) | 0.74  (0.62,0.89) | 0.76  (0.63,0.91) | 0.77  (0.65,0.93) | 0.79  (0.66,0.95) | 0.81  (0.67,0.96) | 0.82  (0.68,0.98) | 0.84  (0.70,1.00) | 0.85  (0.71,1.02) | 0.87  (0.72,1.04) | 0.88  (0.74,1.06) |
|  |
| **0.45** | 0.62  (0.52,0.74) | 0.63  (0.53,0.76) | 0.65  (0.54,0.78) | 0.67  (0.55,0.80) | 0.68  (0.57,0.82) | 0.70  (0.58,0.83) | 0.71  (0.59,0.85) | 0.73  (0.61,0.87) | 0.74  (0.62,0.89) | 0.76  (0.63,0.91) | 0.77  (0.64,0.93) | 0.79  (0.66,0.95) | 0.80  (0.67,0.96) | 0.82  (0.68,0.98) | 0.84  (0.70,1.00) | 0.85  (0.71,1.02) | 0.87  (0.72,1.04) |
|  |
| **0.5** | 0.61  (0.51,0.73) | 0.62  (0.52,0.74) | 0.64  (0.53,0.76) | 0.65  (0.54,0.78) | 0.67  (0.56,0.80) | 0.68  (0.57,0.82) | 0.70  (0.58,0.84) | 0.71  (0.59,0.85) | 0.73  (0.61,0.87) | 0.74  (0.62,0.89) | 0.76  (0.63,0.91) | 0.77  (0.64,0.93) | 0.79  (0.66,0.94) | 0.80  (0.67,0.96) | 0.82  (0.68,0.98) | 0.83  (0.70,1.00) | 0.85  (0.71,1.02) |
|  |
| **0.55** | 0.59  (0.50,0.71) | 0.61  (0.51,0.73) | 0.62  (0.52,0.75) | 0.64  (0.53,0.77) | 0.65  (0.55,0.78) | 0.67  (0.56,0.80) | 0.68  (0.57,0.82) | 0.70  (0.58,0.84) | 0.71  (0.59,0.85) | 0.73  (0.61,0.87) | 0.74  (0.62,0.89) | 0.76  (0.63,0.91) | 0.77  (0.64,0.93) | 0.79  (0.66,0.94) | 0.80  (0.67,0.96) | 0.82  (0.68,0.98) | 0.83  (0.69,1.00) |
|  |
| **0.6** | 0.58  (0.49,0.70) | 0.60  (0.50,0.72) | 0.61  (0.51,0.73) | 0.63  (0.52,0.75) | 0.64  (0.53,0.77) | 0.66  (0.55,0.79) | 0.67  (0.56,0.80) | 0.69  (0.57,0.82) | 0.70  (0.58,0.84) | 0.71  (0.60,0.86) | 0.73  (0.61,0.87) | 0.74  (0.62,0.89) | 0.76  (0.63,0.91) | 0.77  (0.64,0.93) | 0.79  (0.66,0.94) | 0.80  (0.67,0.96) | 0.82  (0.68,0.98) |
|  |
| **0.65** | 0.57  (0.48,0.69) | 0.59  (0.49,0.70) | 0.60  (0.50,0.72) | 0.61  (0.51,0.74) | 0.63  (0.52,0.75) | 0.64  (0.54,0.77) | 0.66  (0.55,0.79) | 0.67  (0.56,0.81) | 0.69  (0.57,0.82) | 0.70  (0.58,0.84) | 0.72  (0.60,0.86) | 0.73  (0.61,0.87) | 0.74  (0.62,0.89) | 0.76  (0.63,0.91) | 0.77  (0.64,0.93) | 0.79  (0.66,0.94) | 0.80  (0.67,0.96) |
|  |
| **0.7** | 0.56  (0.47,0.67) | 0.58  (0.48,0.69) | 0.59  (0.49,0.71) | 0.60  (0.50,0.72) | 0.62  (0.51,0.74) | 0.63  (0.53,0.76) | 0.65  (0.54,0.77) | 0.66  (0.55,0.79) | 0.67  (0.56,0.81) | 0.69  (0.57,0.82) | 0.70  (0.59,0.84) | 0.72  (0.60,0.86) | 0.73  (0.61,0.87) | 0.74  (0.62,0.89) | 0.76  (0.63,0.91) | 0.77  (0.64,0.92) | 0.79  (0.66,0.94) |
|  |
| **0.75** | 0.55  (0.46,0.66) | 0.57  (0.47,0.68) | 0.58  (0.48,0.69) | 0.59  (0.49,0.71) | 0.61  (0.51,0.73) | 0.62  (0.52,0.74) | 0.63  (0.53,0.76) | 0.65  (0.54,0.78) | 0.66  (0.55,0.79) | 0.68  (0.56,0.81) | 0.69  (0.57,0.83) | 0.70  (0.59,0.84) | 0.72  (0.60,0.86) | 0.73  (0.61,0.87) | 0.74  (0.62,0.89) | 0.76  (0.63,0.91) | 0.77  (0.64,0.92) |
|  |
| **0.8** | 0.54  (0.45,0.65) | 0.55  (0.46,0.66) | 0.57  (0.47,0.68) | 0.58  (0.49,0.70) | 0.60  (0.50,0.71) | 0.61  (0.51,0.73) | 0.62  (0.52,0.75) | 0.64  (0.53,0.76) | 0.65  (0.54,0.78) | 0.66  (0.55,0.79) | 0.68  (0.56,0.81) | 0.69  (0.58,0.83) | 0.70  (0.59,0.84) | 0.72  (0.60,0.86) | 0.73  (0.61,0.88) | 0.74  (0.62,0.89) | 0.76  (0.63,0.91) |
